# Supplementary material for: Peritoneal Fluid from Patients with Ovarian Endometriosis Displays Immunosuppressive Potential and Stimulates Th2 Response
Source: MDPI journal article supplement (doi:10.3390/ijms22158134), 2021-07-29
Supplement: s1 [file s1]

## SUPPLEMENTARY FIGURES

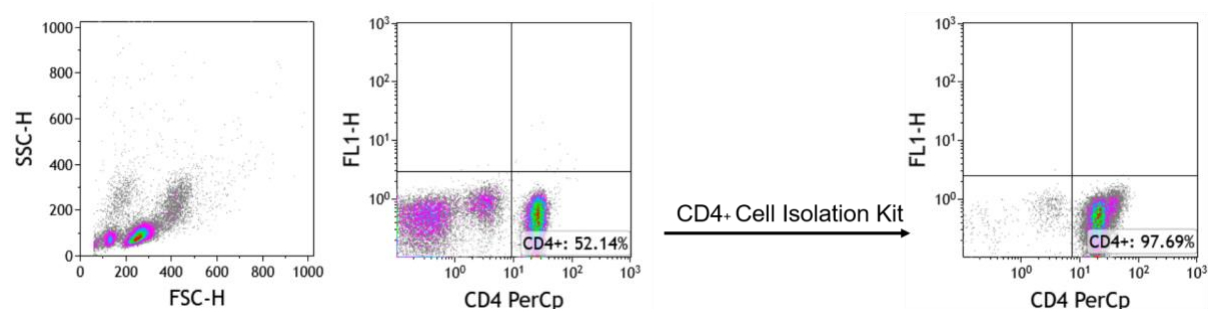

**Supplementary Figure S1.** A representative flow cytometry analysis of the purity of CD4<sup>+</sup> T cell populations obtained following isolation using magnetic beads CD4<sup>+</sup> cell isolation kit.

A unstimulated cells

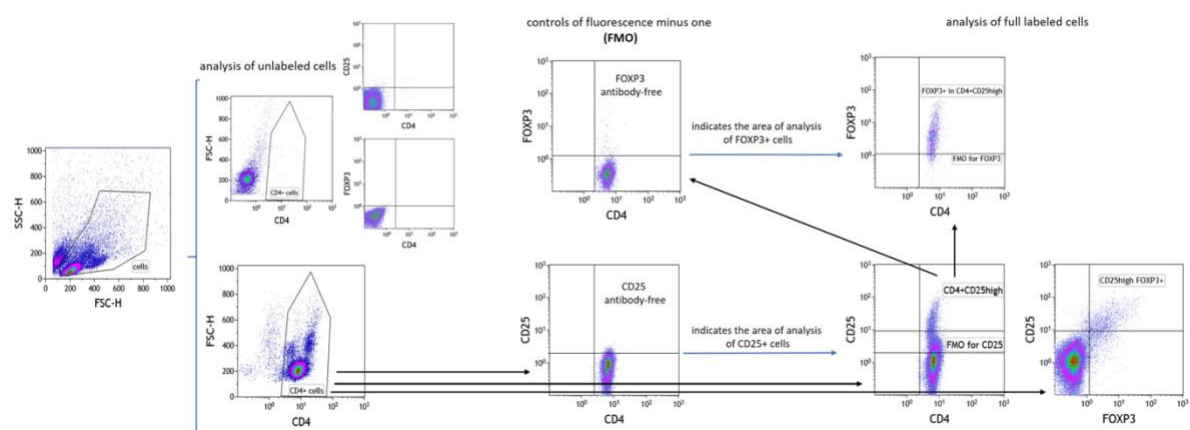

B CD3/CD28+IL-2

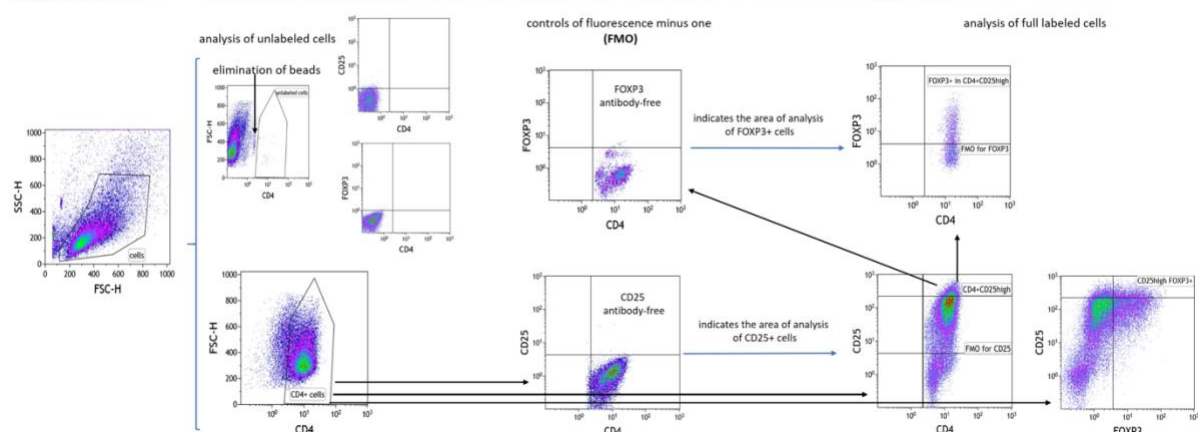

**Supplementary Figure S2.** Gating strategy for flow cytometry identification and evaluation of CD25<sup>high</sup> and CD25<sup>high</sup> FOXP3<sup>+</sup> Treg cells in (A) unstimulated control and (B) CD3/CD28 beads+IL-2-stimulated cultures.

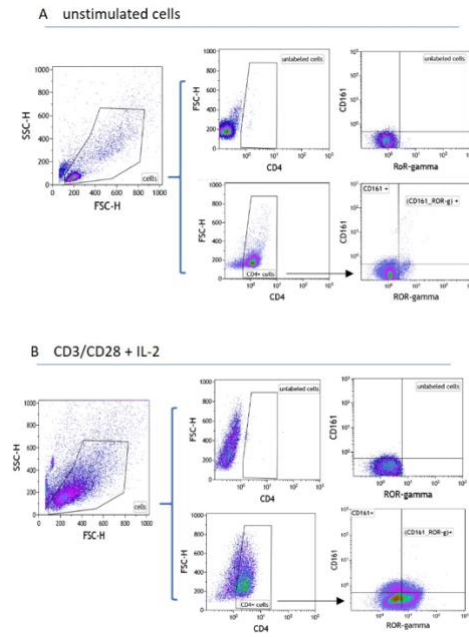

**Supplementary Figure S3.** Gating strategy for flow cytometry identification and evaluation of CD161<sup>+</sup> and CD161<sup>+</sup> RORγ<sup>+</sup> Th17 cells in (A) unstimulated control and (B) CD3/CD28 beads+IL-2-stimulated cultures.
